# Supplementary material for: Phage therapy administered noninvasively could be effective in thin tubes subject to episodic flow despite washout: a simulation study
Source: PubMed Central journal article supplement (PMC6771420; doi:10.1088/1478-3975/ab2ea0), 2019-07-22
Supplement: NIHMS1051836-supplement-Supplement.pdf [file NIHMS1051836-supplement-Supplement.pdf]

Supplementary Information:

Phage therapy administered noninvasively could be effective in thin tubes subject to episodic flow despite washout: a simulation study

---

Celia Blanco and Irene A. Chen

Supplementary Figures S1-S5

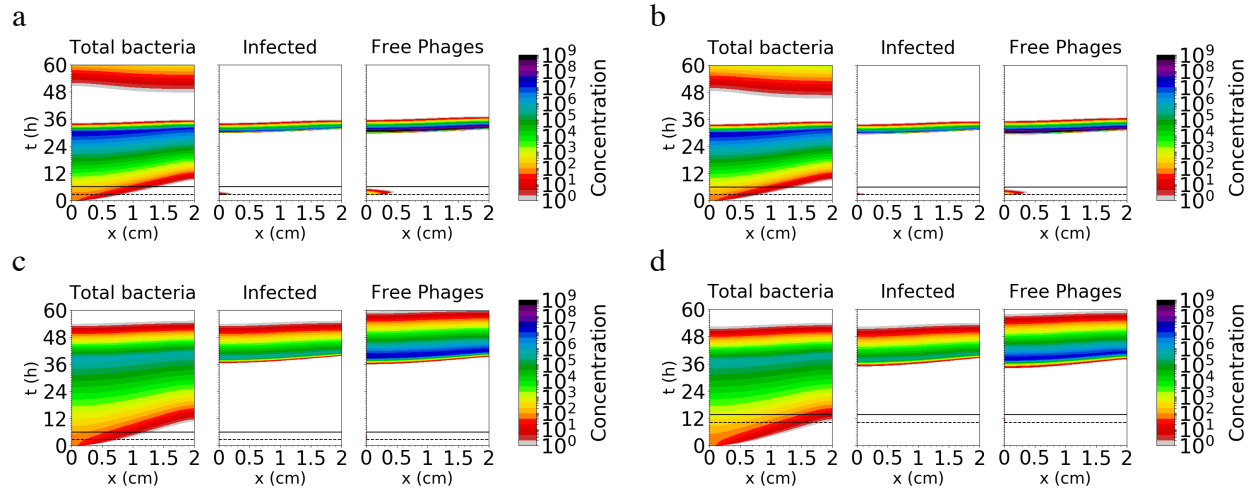

**Figure S1.** Amounts of total bacteria, infected bacteria and free phages obtained by simulation using the same conditions as in Figure 4, except that washout occurs 3.5 hours after the phage dose.

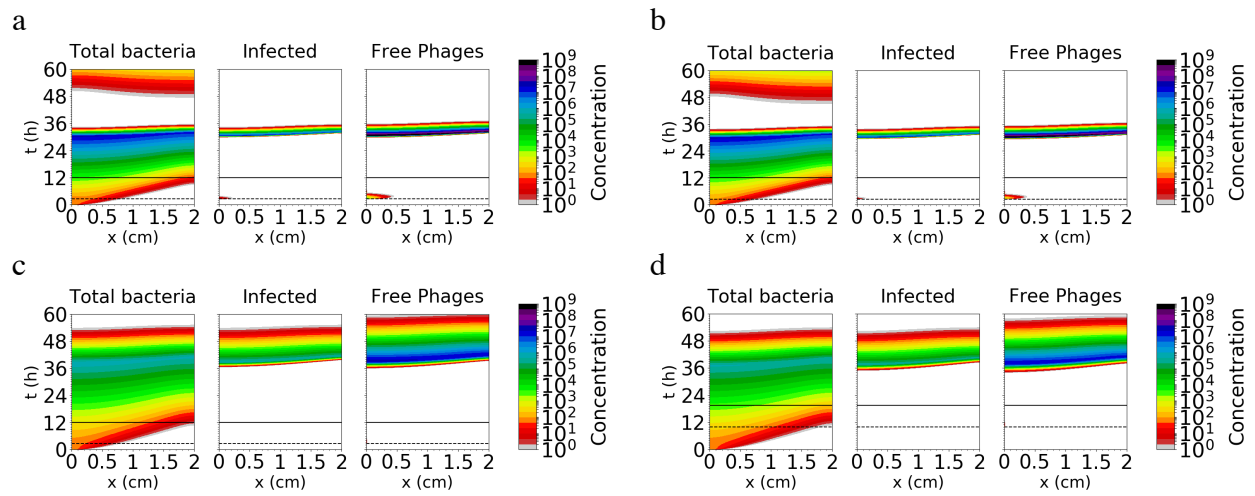

**Figure S2.** Amounts of total bacteria, infected bacteria and free phages obtained by simulation using the same conditions as in Figure 4, except that washout occurs 9.5 hours after the phage dose.

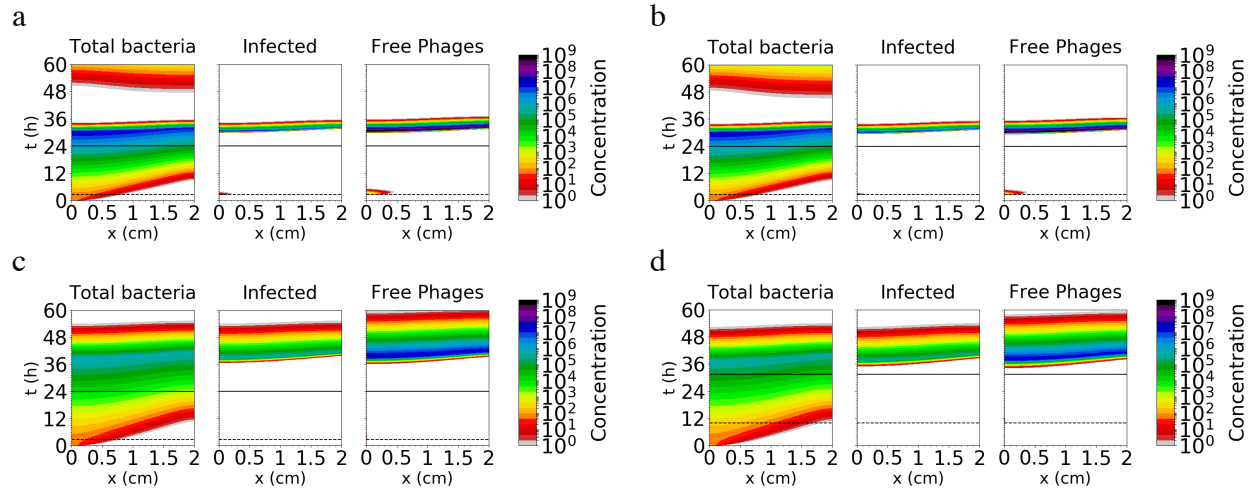

**Figure S3.** Amounts of total bacteria, infected bacteria and free phages obtained by simulation using the same conditions as in Figure 4, except that washout occurs 21.5 hours after the phage dose.

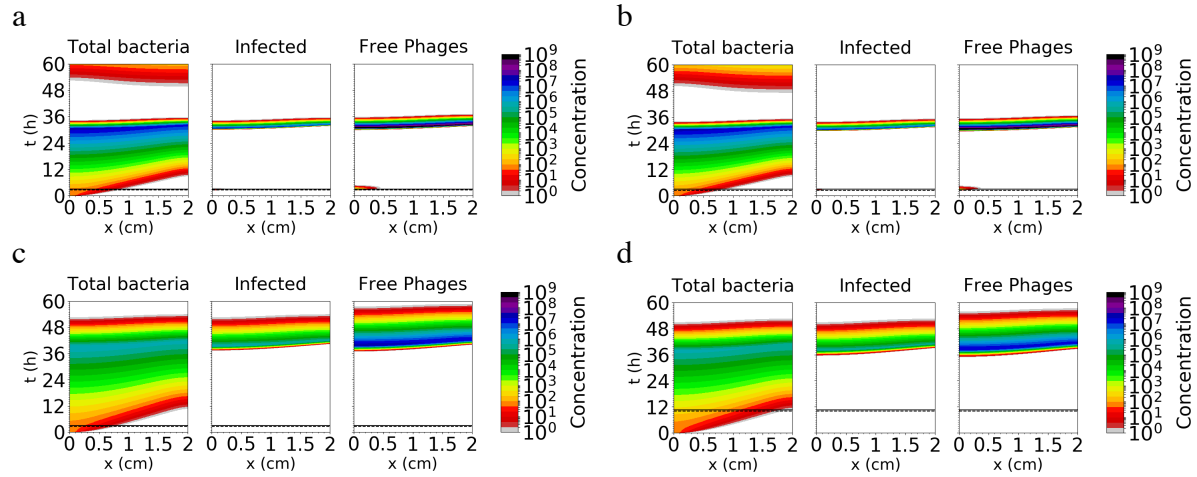

**Figure S4.** Amounts of total bacteria, infected bacteria and free phages obtained by simulation using the same conditions as in Figure 4, except that uninfected cells replicate with rate  $a/2$ .

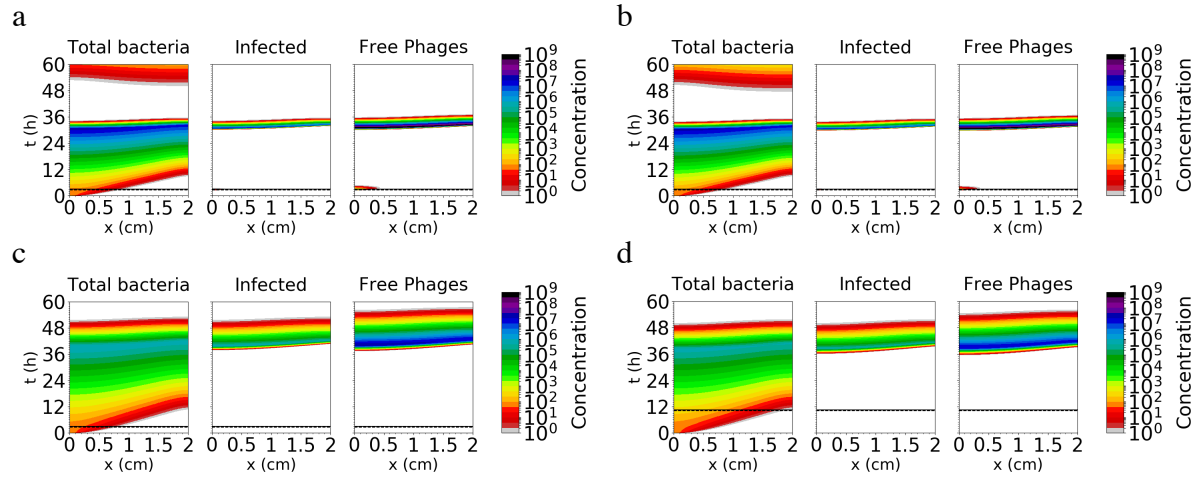

**Figure S5.** Amounts of total bacteria, infected bacteria and free phages obtained by simulation using the same conditions as in Figure 4, except that uninfected cells replicate with rate  $a/10$ .
